# Supplementary material for: Structural and conformational analysis of a biaryl phosphine integrating a calix[4]arene cavity. Can the phosphorus atom behave as an introverted donor?
Source: Royal Society of Chemistry journal article supplement (doi:10.1039/d3dt00612c), 2023-01-01

Supplementary information for

## Structural and conformational analysis of a biaryl phosphine integrating a calix[4]arene cavity. Can the phosphorus atom behave as an introverted donor ?

Christophe Gourlaouen,<sup>a</sup> Fethi Elaieb,<sup>b</sup> Eric Brenner,<sup>b</sup> Dominique Matt,<sup>\*b</sup> Jack Harrowfield<sup>c</sup> and Louis Ricard<sup>d</sup>

**Table S1** Crystal and refinement data of L•CHCl<sub>3</sub>.

**Table S2** Selected bond lengths (Å) and angles (°) for L•CHCl<sub>3</sub>.

**Figure S1** The Hirshfeld surface for L•CHCl<sub>3</sub>, as defined using CrystalExplorer and viewed, left to right, down a, down b and down c, where red regions define points of interaction exceeding dispersion.

**Figure S2** The Hirshfeld surface for [AuCl(L)], as defined using CrystalExplorer and viewed, left to right, down a, down b and down c, where red regions define points of interaction exceeding dispersion.

**Figure S3** Part of one of the chains of L molecules in the crystal of L•CHCl<sub>3</sub> running parallel to b, with the C··C interactions exceeding dispersion shown as dashed lines.

**Figure S4** Non-covalent interactions (NCI) in conformer **D** (optimised structure) with (attractive) electrostatic interactions in blue, attractive dispersion forces in green, and steric repulsions in red.

**Figure S5** Non-covalent interactions in [Au(CO)L]<sup>+</sup> (optimised structure; L is an introverted version of the phosphine), with (attractive) electrostatic interactions in blue, attractive dispersion forces in green, and steric repulsions in red.

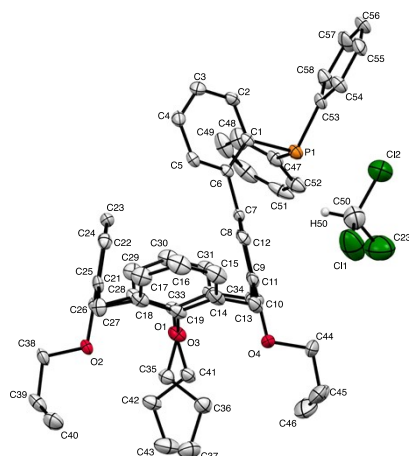

**Table S1** Crystal and refinement data of  $L \cdot CHCl_3$

|                                 |                        |                                                  |               |
|---------------------------------|------------------------|--------------------------------------------------|---------------|
| Formula                         | $C_{59}H_{62}Cl_3O_4P$ | Z                                                | 8             |
| Mr                              | 972.40                 | $D_{calcd}$ (mg.m <sup>-3</sup> )                | 1.239         |
| Crystal size (mm <sup>3</sup> ) | 0.30 x 0.30 x 0.15     | $\mu$ (MoK $\alpha$ ) (mm <sup>-1</sup> )        | 0.253         |
| Crystal system                  | orthorhombic           | $F(000)$ , e                                     | 4112          |
| Space group                     | <i>Pbca</i>            | Refl. measured                                   | 40548         |
| <i>a</i> (Å)                    | 16.8473(19)            | Refl. unique                                     | 9873          |
| <i>b</i> (Å)                    | 16.4750(19)            | $R_{int}$                                        | 0.0616        |
| <i>c</i> (Å)                    | 37.556(4)              | Parameters ref.                                  | 628           |
| $\alpha$ (°)                    | 90.0                   | $R_1(F)/wR_2(F^2)$ (all refls.)                  | 0.0967/0.2991 |
| $\beta$ (°)                     | 90.0                   | GoF ( $F^2$ )                                    | 1.076         |
| $\gamma$ (°)                    | 90.0                   | $\Delta\rho_{fin}$ (max/min) (eÅ <sup>-3</sup> ) | 1.106/-1.391  |
| <i>V</i> (Å <sup>3</sup> )      | 10424(2)               |                                                  |               |

**Table S2** Selected bond lengths (Å) and angles (°) for L•CHCl<sub>3</sub>

| lengths (Å) |          |           |           |
|-------------|----------|-----------|-----------|
| P1-C1       | 1.841(4) | H50-C7    | 2.860(5)  |
| P1-C47      | 2.852(5) | H50-C12   | 2.795(5)  |
| P1-C53      | 1.833(5) | C23...C7  | 4.241(5)  |
| C10-O4      | 1.388(5) | C16...C30 | 10.122(6) |
| C33-O3      | 1.381(5) | C50-Cl1   | 1.722(8)  |
| C26-O2      | 1.387(5) | C50-Cl2   | 1.744(8)  |
| C19-O1      | 1.374(5) | C50-Cl3   | 1.768(8)  |

  

| Selected angles (°) |          |                   |          |
|---------------------|----------|-------------------|----------|
| Bond angles         |          | Torsion angles    |          |
| C1-P1-C53           | 102.2(2) | C1-C6-C7-C12      | 132.6(4) |
| C1-P1-C47           | 100.9(2) | P1-C1-C6-C7       | - 8.3(6) |
| C53-P1-C47          | 101.1(2) | Interplane angles |          |
| P1-C1-C6            | 120.1(3) | ring C27/ring C23 | 21.6     |
|                     |          | ring C19/ring C33 | 68.6     |

**Figure S1** The Hirshfeld surface for L•CHCl<sub>3</sub>, as defined using CrystalExplorer and viewed, left to right, down a, down b and down c, where red regions define points of interaction exceeding dispersion.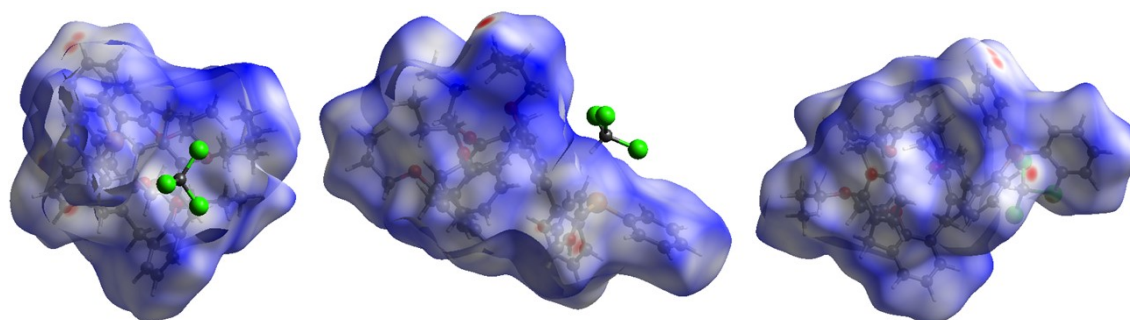

**Figure S2** The Hirshfeld surface for  $[\text{AuCl}(\text{L})]$ , as defined using CrystalExplorer and viewed, left to right, down a, down b and down c, where red regions define points of interaction exceeding dispersion.

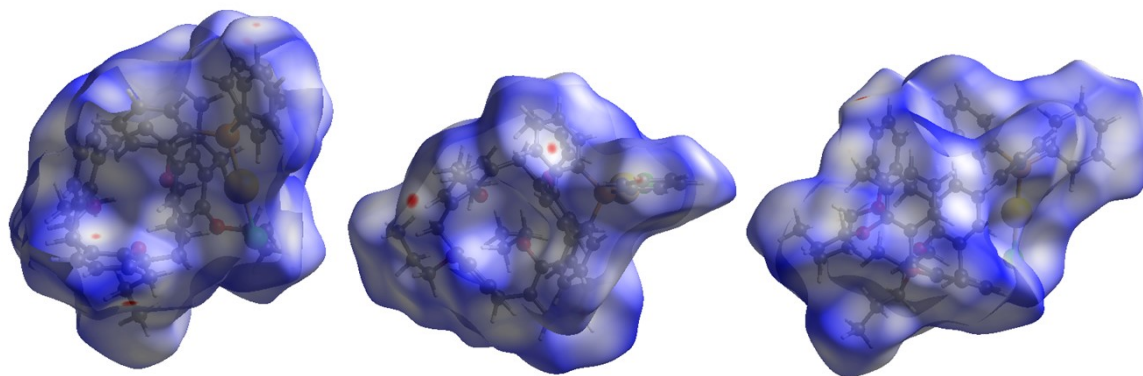

**Figure S3** Part of one of the chains of L molecules in the crystal of  $\text{L}\cdot\text{CHCl}_3$  running parallel to b, with the  $\text{C}\cdots\text{C}$  interactions exceeding dispersion shown as dashed lines.

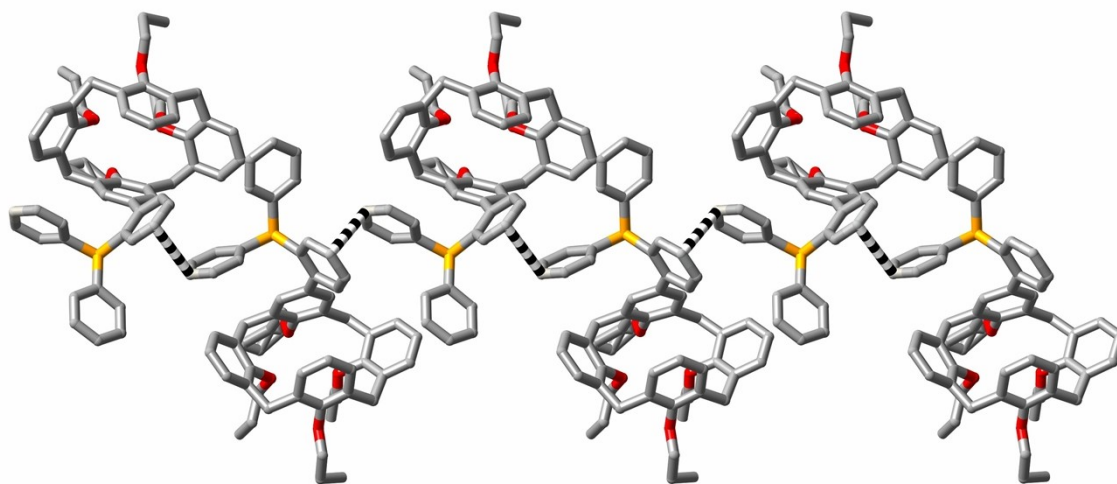

**Figure S4** Non-covalent interactions (NCI) in conformer **D** (optimised structure) with (attractive) electrostatic interactions in blue, attractive dispersion forces in green, and steric repulsions in red.

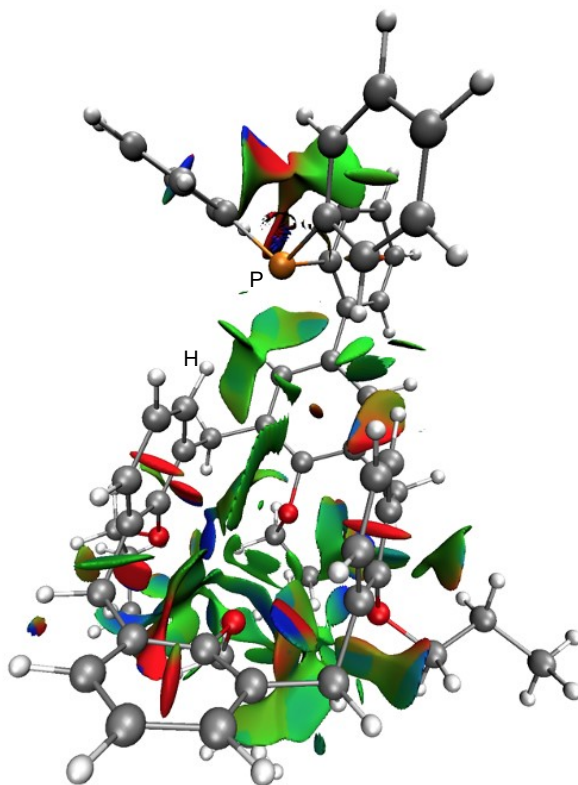

**Fig. S5** Non-covalent interactions in  $[\text{Au}(\text{CO})\text{L}]^+$  (optimised structure; introverted L), with (attractive) electrostatic interactions in blue, attractive dispersion forces in green, and steric repulsions in red.

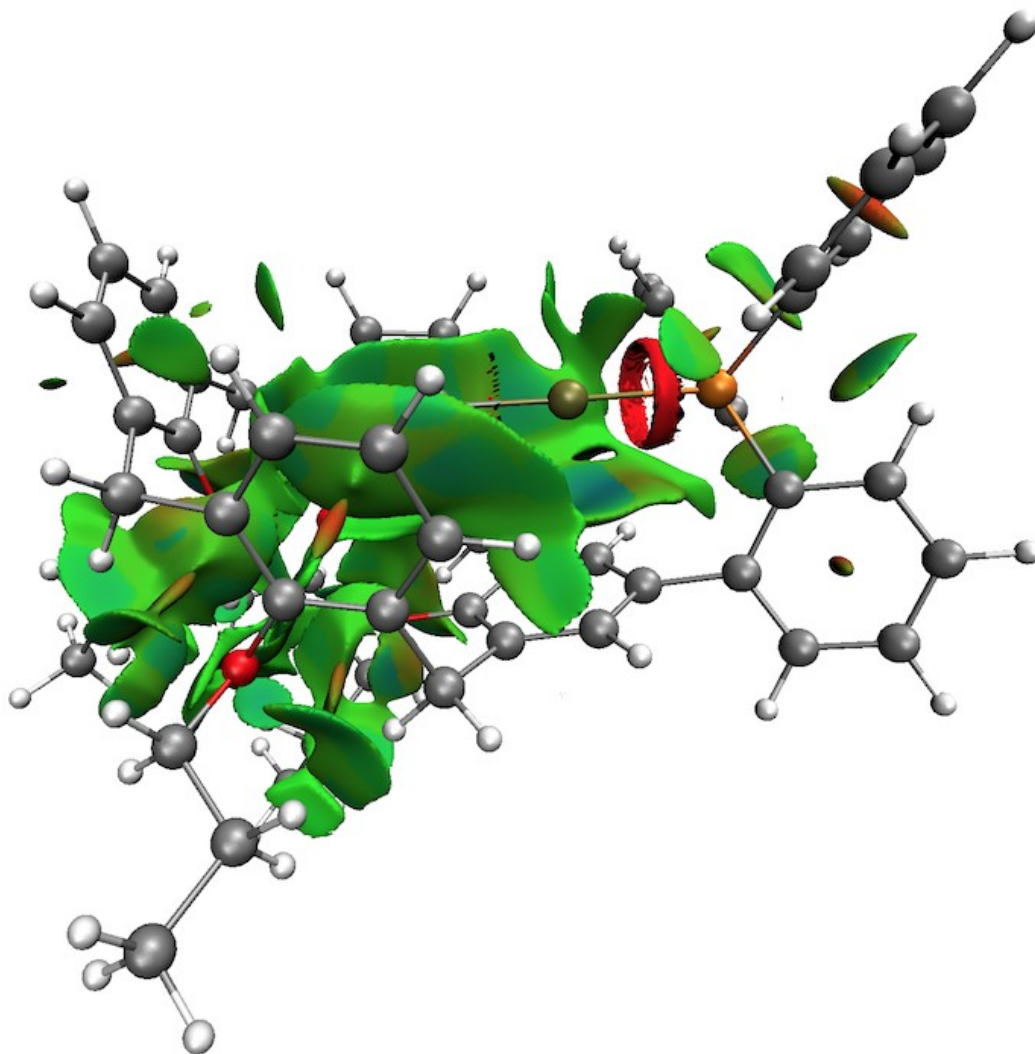

Supplement: d3dt00612c2.pdf [file d3dt00612c2.pdf]
